# Supplementary material for: BK Channels Are Indispensable for Endothelial Function in Small Pulmonary Arteries
Source: Research Square preprint supplement (doi:10.21203/rs.3.rs-6506992/v1), 2025-05-07
Supplement: Supplementary file 1 [file a0bbb2dfcb0078210fbb9d55.docx]

**Supplemetary data**

**
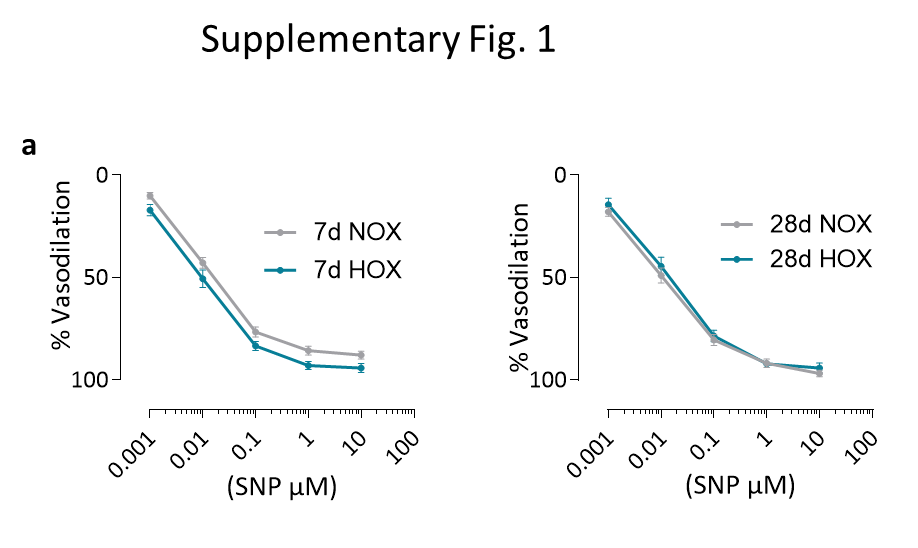
**

**Figure S1** **Sodium nitroprusside (SNP) response of mice in normoxia vs hypoxia at 7 days and 28 days a-b)** Effect of sodium nitroprusside (SNP) at cumulative doses on Phenylephrine (PE) (1µM) preconstricted mouse pulmonary artery rings **a)** 7 days under normoxia and hypoxia (n=16 rings in NOX and n=18 rings in HOX) **b)** 28 days under normoxia and hypoxia (n=16 rings in NOX and n=13 rings in HOX).

**
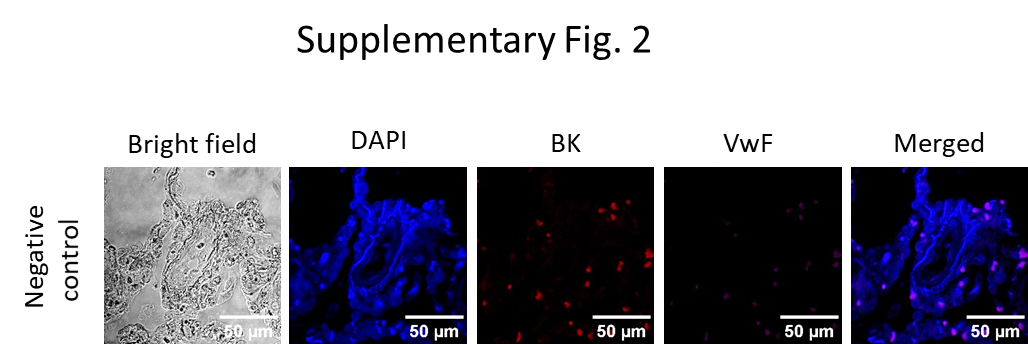
**

**Figure S2 BK staining of human donor PAs.** Negative control for BK staining in human donor PAs showing the background signal in the absence of primary antibodies.


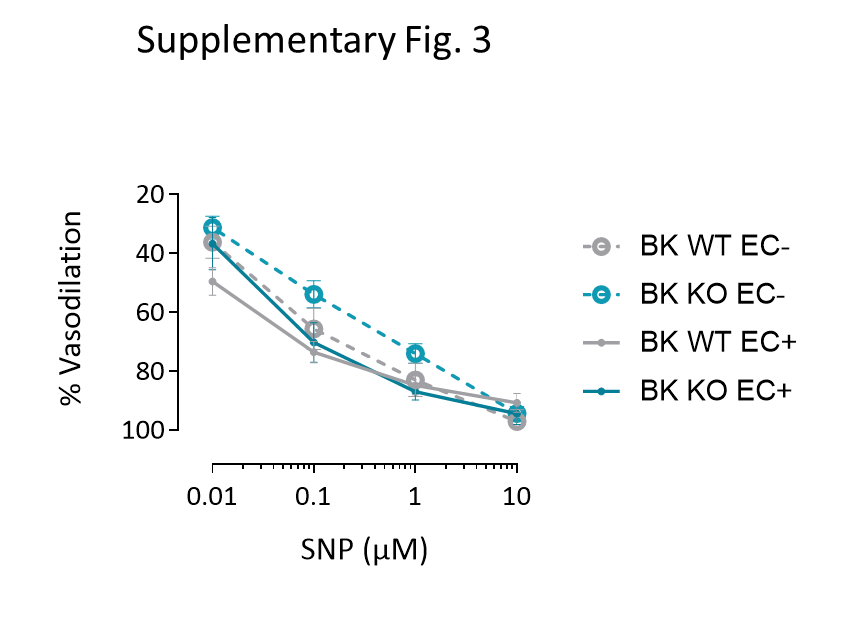


**Figure S3** **Sodium nitroprusside (SNP) response of BK WT vs BK KO mice PA rings.** Effect of sodium nitroprusside (SNP) at cumulative doses on Phenylephrine (PE) (1µM) preconstricted mouse pulmonary artery rings with intact endothelium (n=8 for WT and n=7 for KO) and endothelium denuded (n=11 for WT and n=15 for KO).


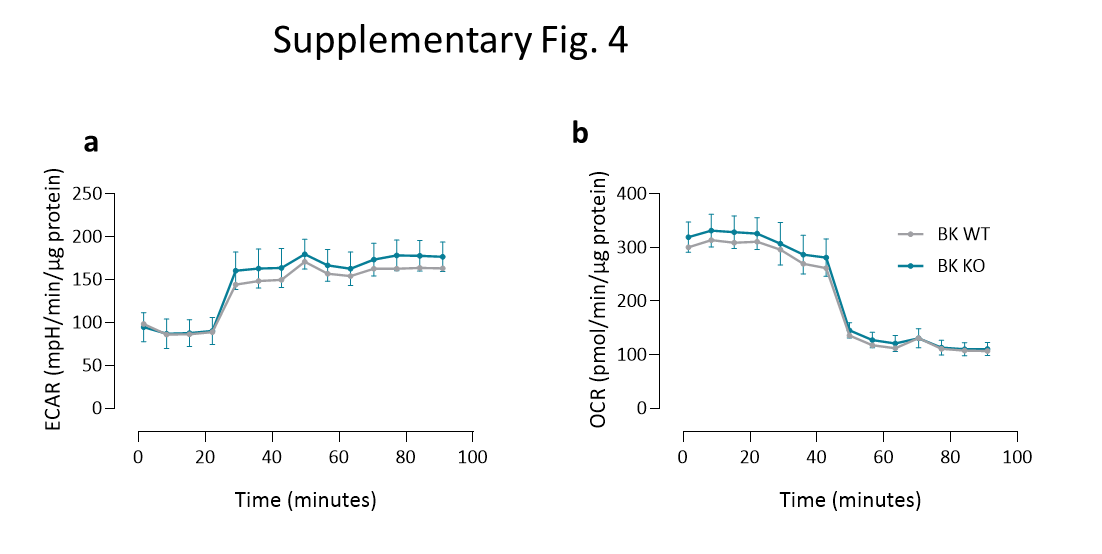


**Figure S4** **Disrupted bioenergetics due to lack of BK a)** Glycolytic ability under mitostress condition represented by ECAR curve (n=6). **b)** Mitochondrial respiration under glycolytic stress condition represented by OCR curve (n=6).


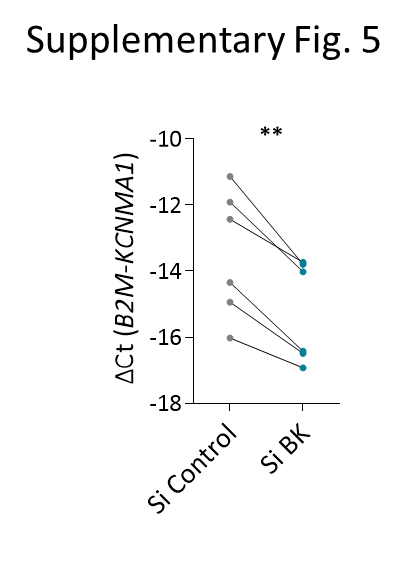


**Figure S5** **Silencing of *KCNMA1*** qPCR of hPAECs proving the decreased expression of *KCNMA1* after siRNA treatment compared to siControl in the same donor cells (n=6). ** p < 0.01 paired t-test, data are presented as mean ± SEM.


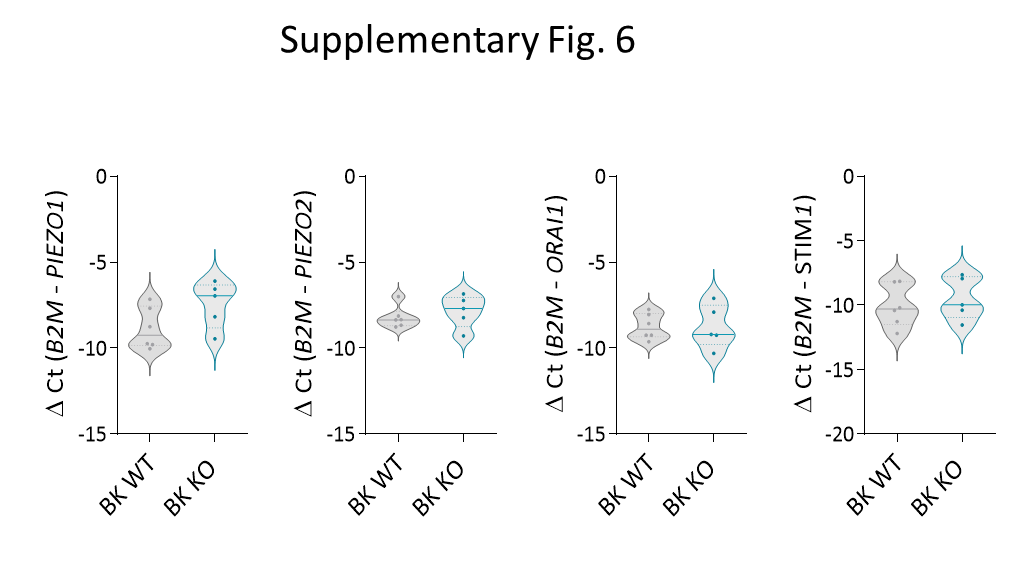


**Figure S6** **Expression of calcium influx channels in BK WT vs BK KO mice** qPCR showing similar mRNA expression levels of piezo-1, piezo-2, STIM and ORAI channels in BK WT (n=6) vs BK KO mice (n=5).
