# Supplementary figures and images for: BK Channels Are Indispensable for Endothelial Function in Small Pulmonary Arteries
Source: Research Square preprint supplement (doi:10.21203/rs.3.rs-6506992/v1), 2025-05-07

**Western blot images uncropped**


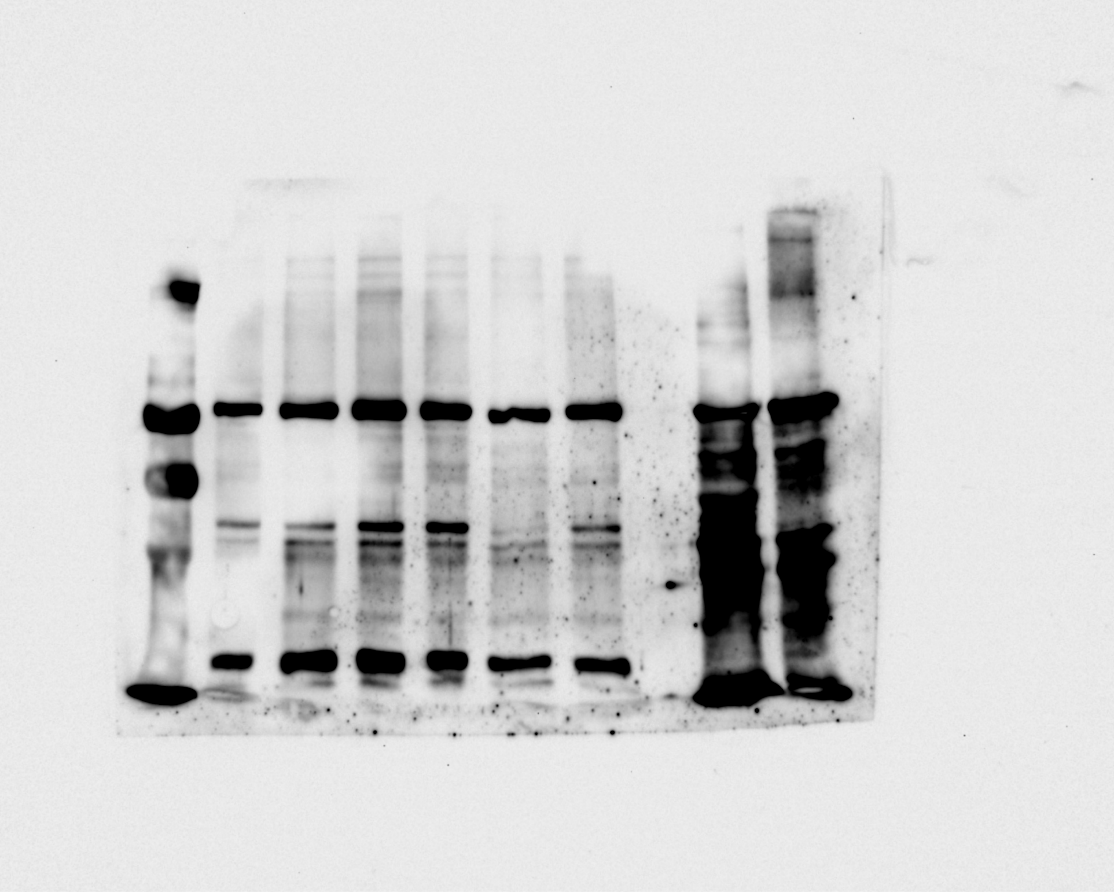


**Fig 3b BKCa**


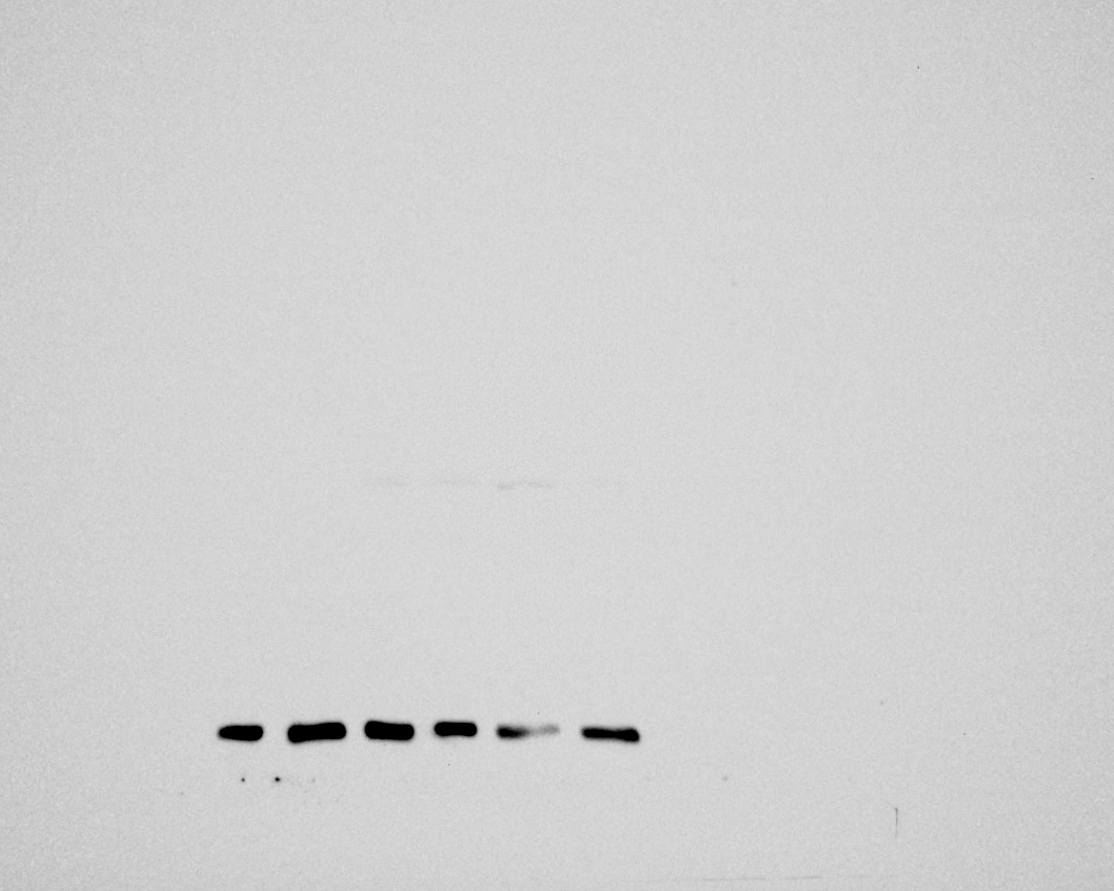


**Fig 3b GAPDH**


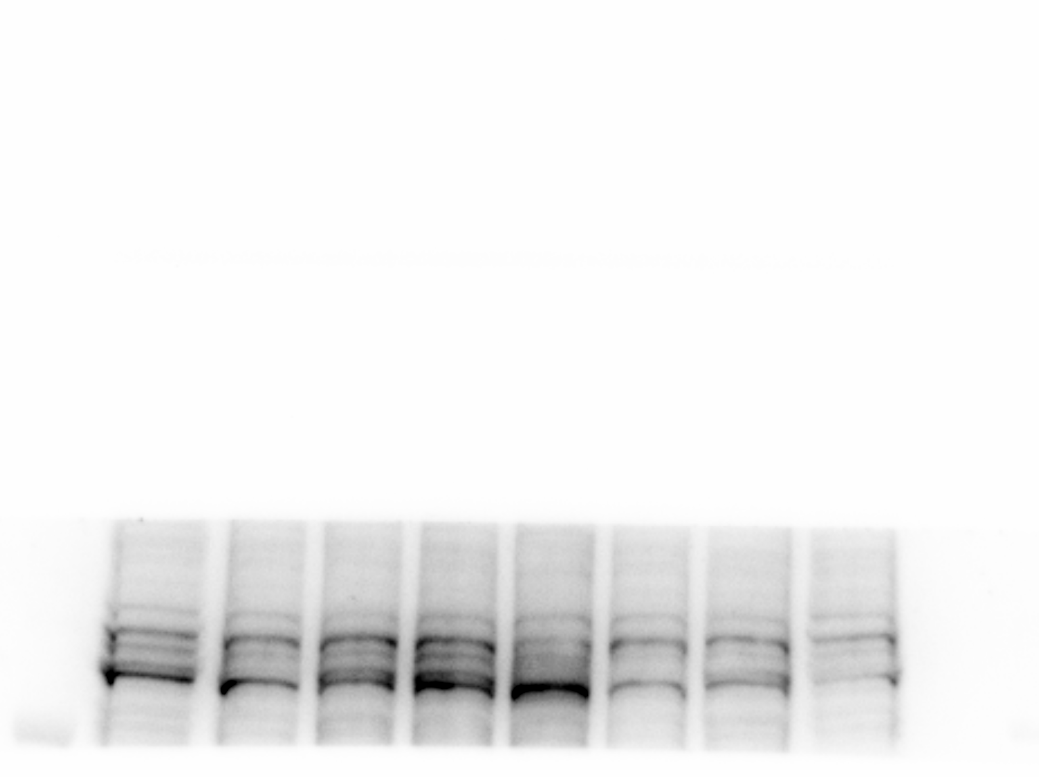


**Fig 4c BK**


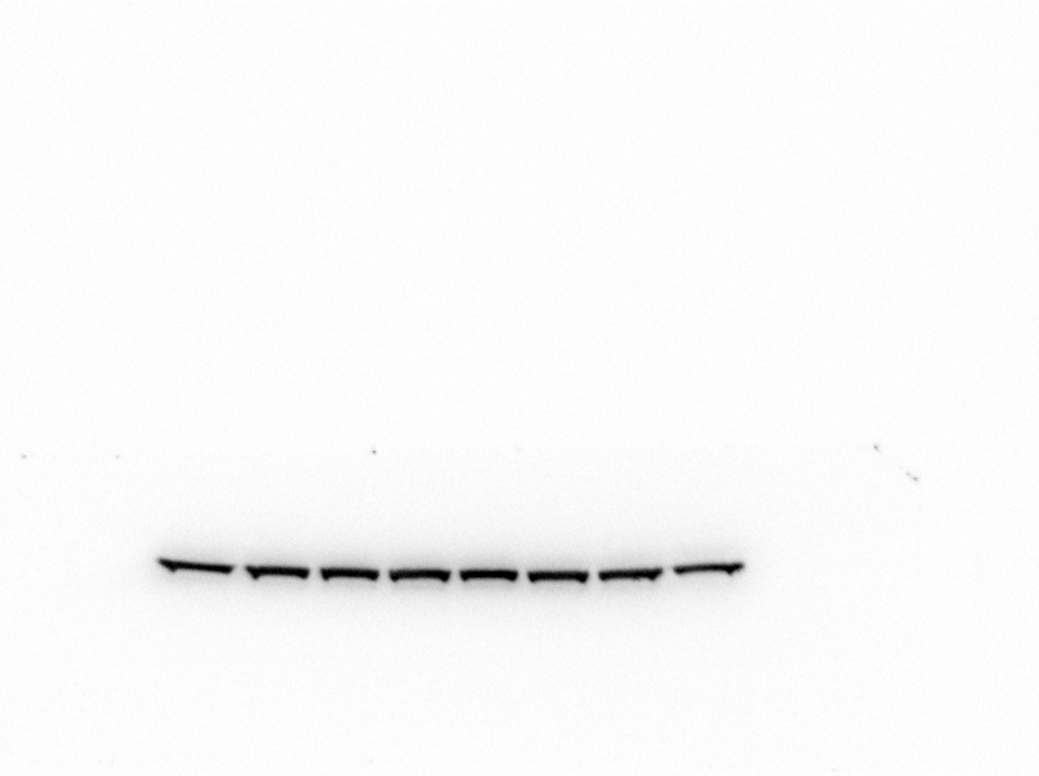


**Fig 4c B-Actin**

Supplement: Supplementary file 2 [file bfbeccb41188ad66b44c0016.docx]
